# Supplementary material
Source: ML conference proceedings conference paper supplement (https://openreview.net/forum?id=9t7gfYUp0U)

# MLEBench-Lite Results

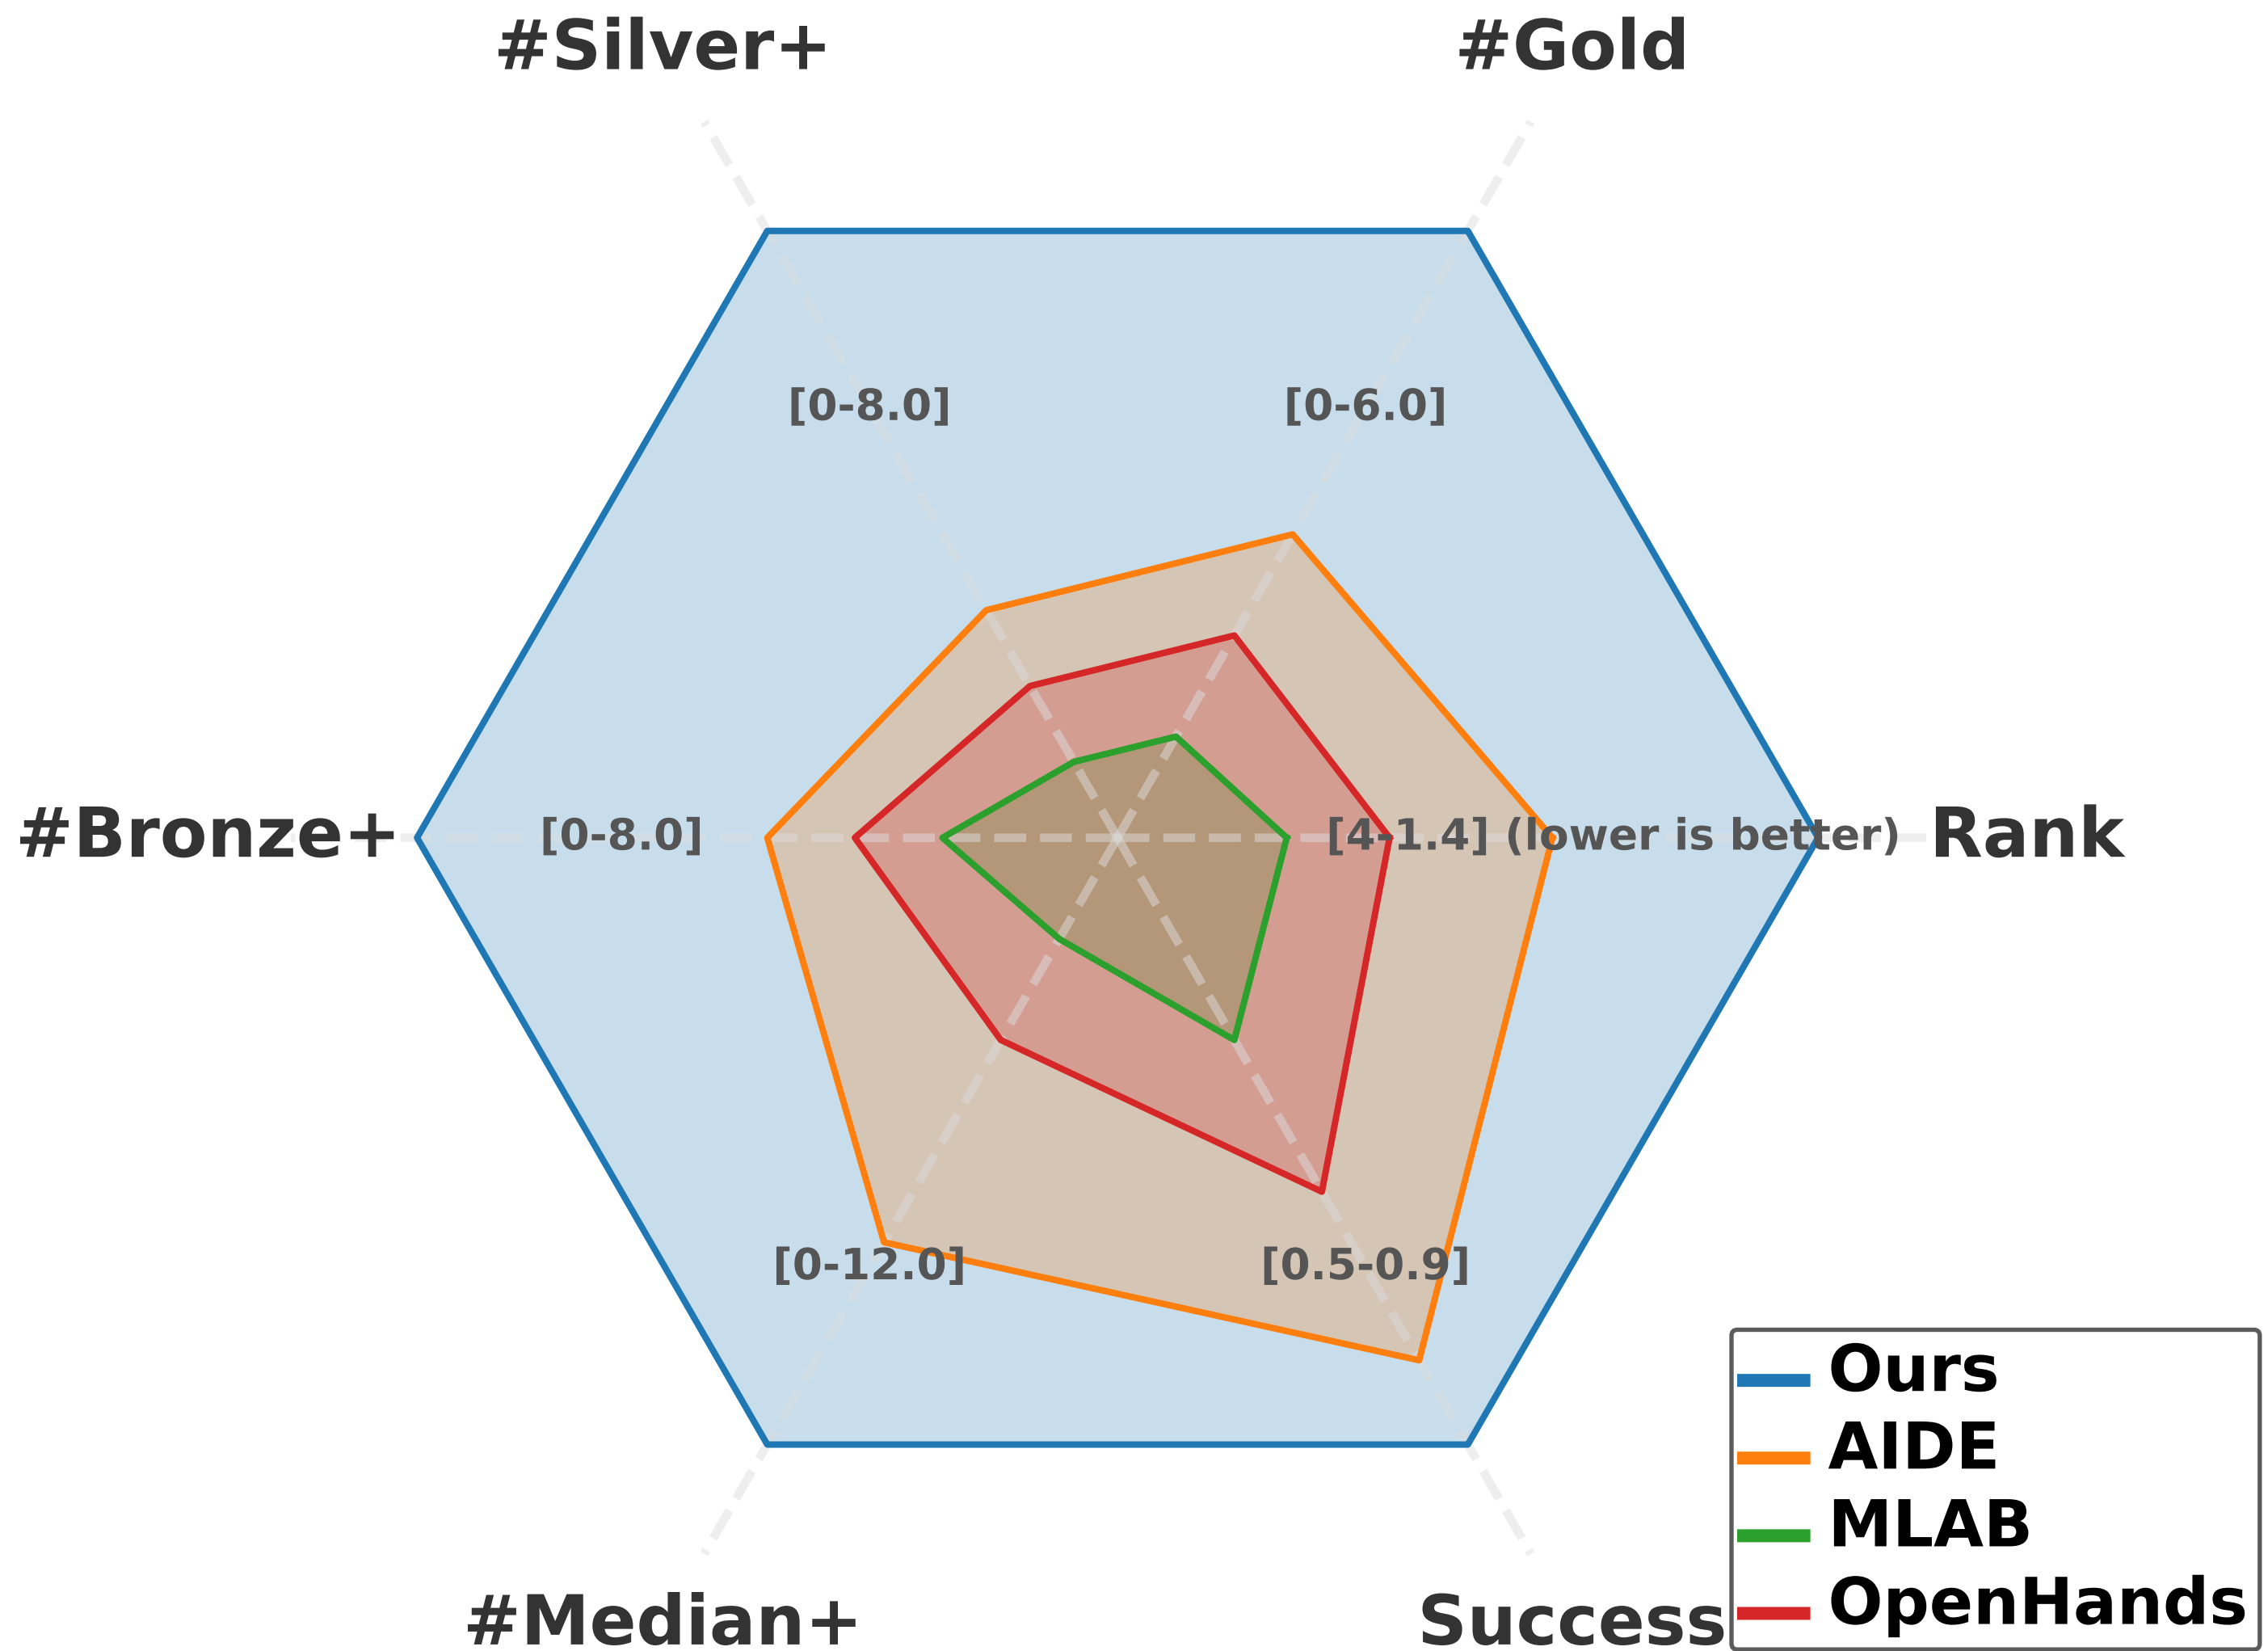

Supplement: supplementary_material [file mlebench_vis.pdf › supplemental/AutoMLAgent/tools/visualization/mlebench_vis.pdf]

# Performance Metrics Across Different Retrieval Counts

Performance Metrics

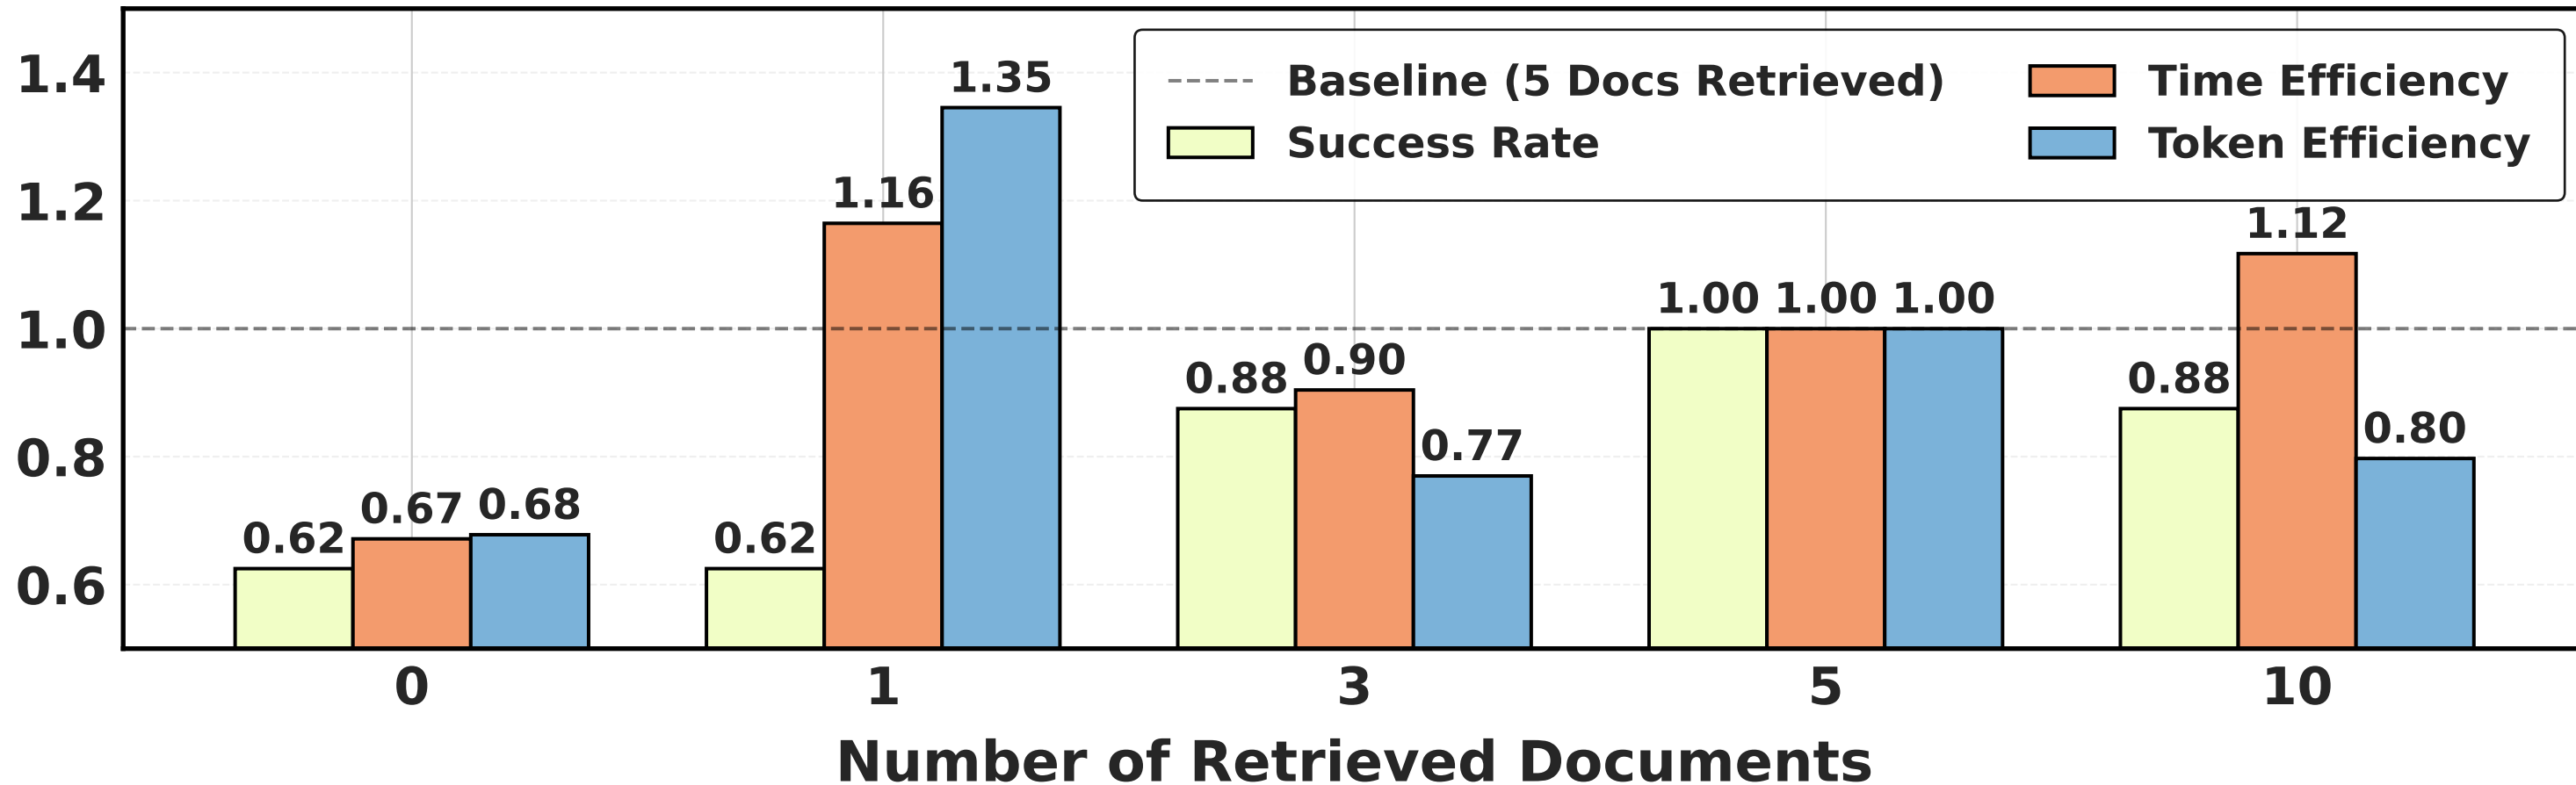

Supplement: supplementary_material [file retrieved_number_plots.pdf › supplemental/AutoMLAgent/tools/visualization/retrieved_number_plots.pdf]

# Performance Metrics Across Different Offline Indexing Settings

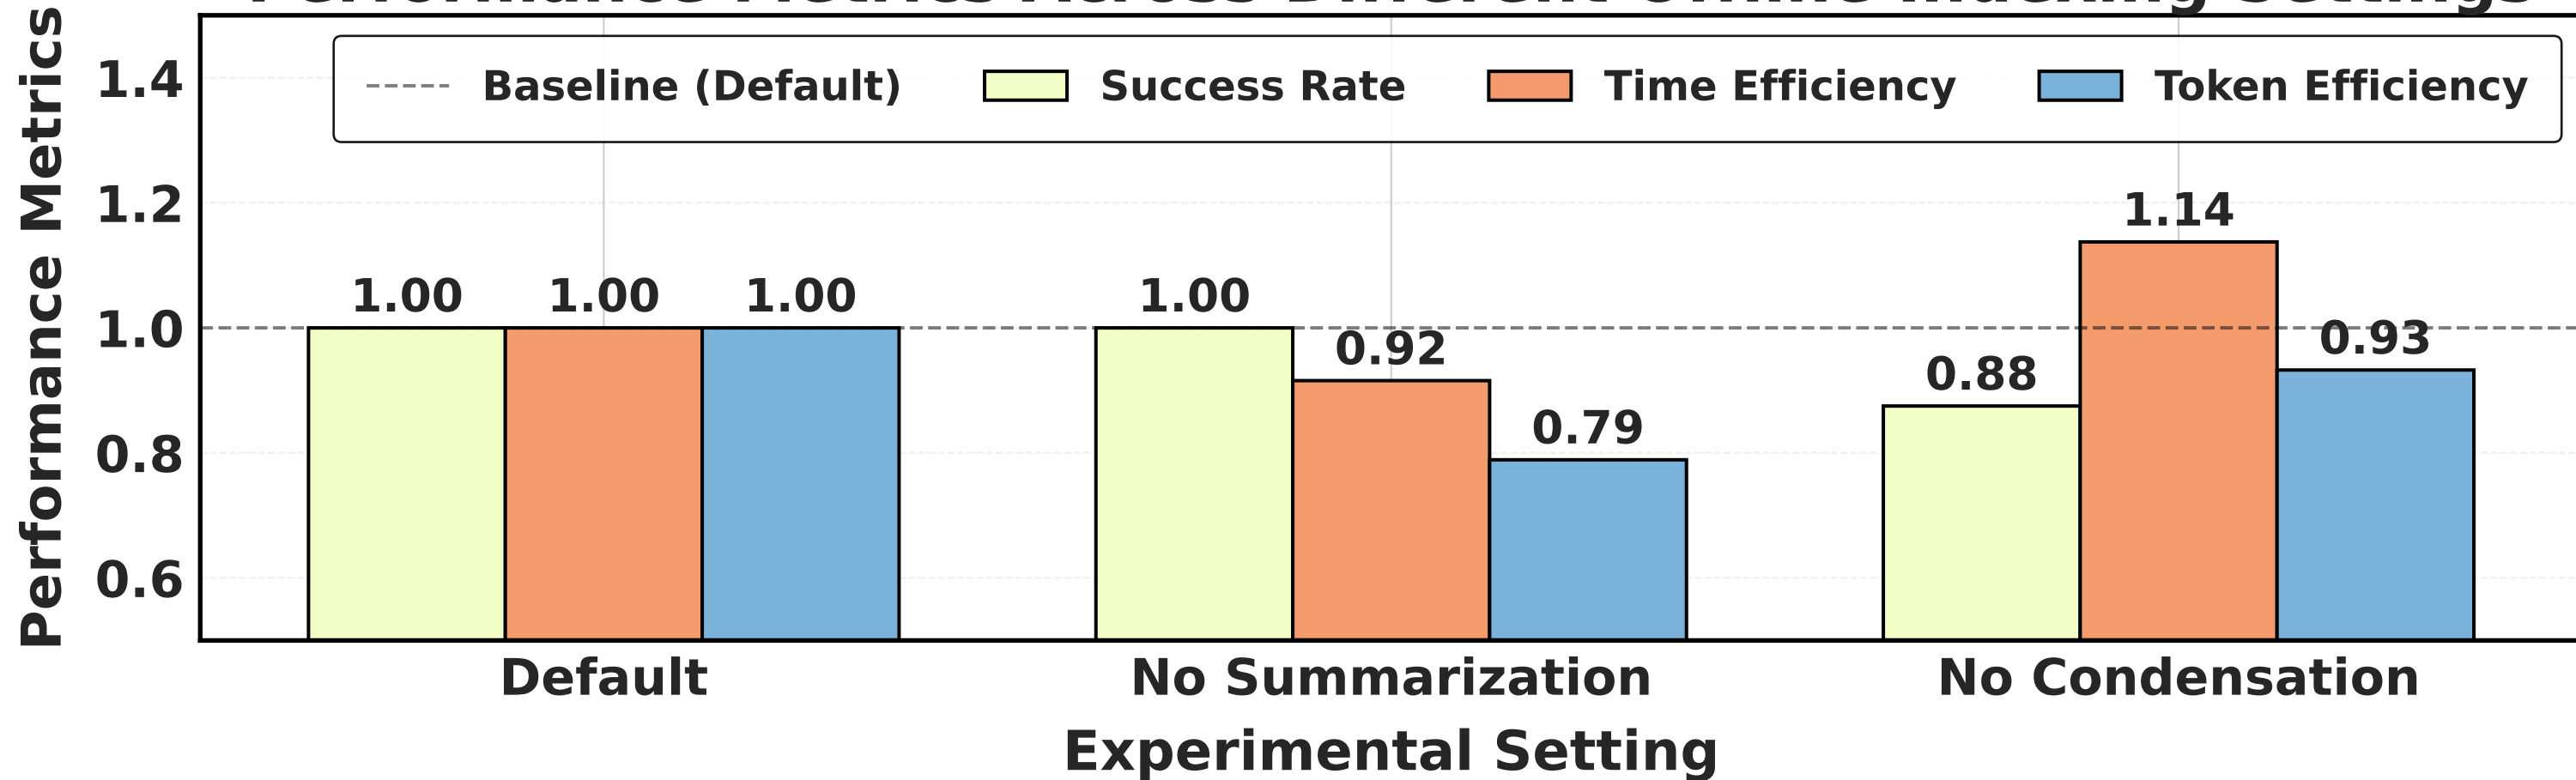

Supplement: supplementary_material [file tutorial_sum_plots.pdf › supplemental/AutoMLAgent/tools/visualization/tutorial_sum_plots.pdf]
